# Supplementary material for: Uridine Inhibits Hepatocellular Carcinoma Cell Development by Inducing Ferroptosis
Source: MDPI journal article supplement (doi:10.3390/jcm12103552), 2023-05-18
Supplement: s1 [file s1]

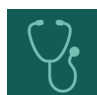

## Supplementary Materials

Table S1. The correlation between CAD expression and clinicopathological features in HCC.

| Clinical Variables     | No. of Patients | CAD Expression |              | p Value      |
|------------------------|-----------------|----------------|--------------|--------------|
|                        | n = 115         | High (n = 57)  | Low (n = 58) |              |
| Gender                 |                 |                |              | 0.180        |
| Female                 | 44              | 18 (15.65%)    | 26 (22.61%)  |              |
| Male                   | 71              | 39 (33.91%)    | 32 (27.83%)  |              |
| Age(years)             |                 |                |              | 0.058        |
| <60                    | 46              | 28 (24.35%)    | 18 (15.65%)  |              |
| ≥60                    | 69              | 29 (25.22%)    | 40 (34.78%)  |              |
| AFP(ng/ml)             |                 |                |              | 0.456        |
| >400                   | 62              | 33 (28.70%)    | 29 (25.22%)  |              |
| ≤400                   | 53              | 24 (20.87%)    | 29 (25.22%)  |              |
| ALT(U/L)               |                 |                |              | 0.058        |
| >40                    | 46              | 28 (25.22%)    | 18 (14.78%)  |              |
| ≤40                    | 69              | 29 (24.35%)    | 40 (35.65%)  |              |
| AST(U/L)               |                 |                |              | 0.852        |
| >40                    | 63              | 32 (27.83%)    | 31 (26.96%)  |              |
| ≤40                    | 52              | 25 (21.74%)    | 27 (23.48%)  |              |
| Child-Pugh Class       |                 |                |              | <b>0.049</b> |
| A                      | 77              | 33 (28.70%)    | 44 (38.26%)  |              |
| B                      | 38              | 24 (20.87%)    | 14 (12.17%)  |              |
| Microvascular invasion |                 |                |              | 0.056        |
| No                     | 70              | 40 (34.78%)    | 30 (26.09%)  |              |
| Yes                    | 45              | 17 (14.78%)    | 28 (24.35%)  |              |
| Tumor size(cm)         |                 |                |              | <b>0.041</b> |
| ≤5                     | 60              | 24 (20.87%)    | 36 (31.30%)  |              |
| >5                     | 55              | 33 (28.69%)    | 22 (19.13%)  |              |
| Tumor number           |                 |                |              | 0.703        |
| Multiple               | 71              | 34 (29.57%)    | 37 (32.17%)  |              |
| Single                 | 44              | 23 (20.00%)    | 21 (18.26%)  |              |
| Tumor encapsulation    |                 |                |              | 0.572        |
| No                     | 68              | 32 (27.83%)    | 36 (31.30%)  |              |
| Yes                    | 47              | 25 (21.74%)    | 22 (19.13%)  |              |
| Tumor differentiation  |                 |                |              | <b>0.041</b> |
| Well                   | 56              | 22 (19.13%)    | 34 (29.57%)  |              |
| Poor                   | 59              | 35 (30.43%)    | 24 (20.87%)  |              |
| HBsAg                  |                 |                |              | 0.268        |
| Negative               | 14              | 9 (7.83%)      | 5 (4.35%)    |              |
| Positive               | 101             | 48 (41.74%)    | 53 (46.09%)  |              |
| Edmonson grade         |                 |                |              | 0.147        |
| II                     | 64              | 30 (26.09%)    | 34 (29.56%)  |              |
| III                    | 27              | 11 (9.57%)     | 16 (13.91%)  |              |
| IV                     | 24              | 16 (13.91%)    | 8 (6.96%)    |              |

**Table S2.** The correlation between DHODH expression and clinicopathological features in HCC.

| Clinical Variables     | No. of Patients | DHODH Expression |              | <i>p</i> Value |
|------------------------|-----------------|------------------|--------------|----------------|
|                        | n = 115         | High (n = 58)    | Low (n = 57) |                |
| Gender                 |                 |                  |              | 0.703          |
| Female                 | 44              | 21 (18.26%)      | 23 (20.00%)  |                |
| Male                   | 71              | 37 (32.17%)      | 34 (29.57%)  |                |
| Age(years)             |                 |                  |              | 0.850          |
| <60                    | 46              | 24 (20.87%)      | 22 (19.13%)  |                |
| ≥60                    | 69              | 34 (29.57%)      | 35 (30.43%)  |                |
| AFP(ng/ml)             |                 |                  |              | 0.062          |
| >400                   | 62              | 26 (22.61%)      | 36 (31.30%)  |                |
| ≤400                   | 53              | 32 (27.83%)      | 21 (18.26%)  |                |
| ALT(U/L)               |                 |                  |              | 0.087          |
| >40                    | 46              | 28 (24.35%)      | 18 (15.65%)  |                |
| ≤40                    | 69              | 30 (26.09%)      | 39 (33.91%)  |                |
| AST(U/L)               |                 |                  |              | 0.456          |
| >40                    | 63              | 34 (29.57%)      | 29 (25.22%)  |                |
| ≤40                    | 52              | 24 (20.87%)      | 28 (24.35%)  |                |
| Child-Pugh Class       |                 |                  |              | <b>0.010</b>   |
| A                      | 77              | 32 (27.83%)      | 45 (39.13%)  |                |
| B                      | 38              | 26 (22.61%)      | 12 (10.43%)  |                |
| Microvascular invasion |                 |                  |              | 0.446          |
| No                     | 70              | 33 (28.70%)      | 37 (32.17%)  |                |
| Yes                    | 45              | 25 (21.74%)      | 20 (17.39%)  |                |
| Tumor size(cm)         |                 |                  |              | 0.193          |
| ≤5                     | 60              | 34 (29.57%)      | 26 (22.61%)  |                |
| >5                     | 55              | 24 (20.87%)      | 31 (26.96%)  |                |
| Tumor number           |                 |                  |              | 0.848          |
| Multiple               | 71              | 35 (30.43%)      | 36 (31.30%)  |                |
| Single                 | 44              | 23 (20.00%)      | 21 (18.26%)  |                |
| Tumor encapsulation    |                 |                  |              | 0.450          |
| No                     | 68              | 32 (27.83%)      | 36 (31.30%)  |                |
| Yes                    | 47              | 26 (22.61%)      | 21 (18.26%)  |                |
| Tumor differentiation  |                 |                  |              | 0.265          |
| Well                   | 56              | 25 (21.74%)      | 31 (26.96%)  |                |
| Poor                   | 59              | 33 (28.70%)      | 26 (22.61%)  |                |
| HBsAg                  |                 |                  |              | 0.152          |
| Negative               | 14              | 10 (8.70%)       | 4 (3.48%)    |                |
| Positive               | 101             | 48 (41.74%)      | 53 (46.09%)  |                |
| Edmonson grade         |                 |                  |              | 0.158          |
| II                     | 64              | 28 (24.35%)      | 36 (31.3%)   |                |
| III                    | 27              | 14 (12.17%)      | 13 (11.3%)   |                |
| IV                     | 24              | 16(13.91%)       | 8 (7%)       |                |

**Table S3.** The correlation between Uridine level and clinicopathological features in HCC.

| Clinical Variables     | No. of Patients | Uridine Level |              | <i>p</i> Value |
|------------------------|-----------------|---------------|--------------|----------------|
|                        | n=46            | High (n = 23) | Low (n = 23) |                |
| Gender                 |                 |               |              | 0.665          |
| Female                 | 6               | 2 (4.3%)      | 4 (8.7%)     |                |
| Male                   | 40              | 21 (45.7%)    | 19 (41.3%)   |                |
| Age(years)             |                 |               |              | 0.236          |
| <60                    | 25              | 10 (21.7%)    | 15 (32.6%)   |                |
| ≥60                    | 21              | 13 (28.3%)    | 8 (17.4%)    |                |
| AFP(ng/ml)             |                 |               |              | 0.038          |
| >400                   | 22              | 7 (15.2%)     | 15 (32.6%)   |                |
| ≤400                   | 24              | 16 (34.8%)    | 8 (17.4%)    |                |
| ALT(U/L)               |                 |               |              | 0.376          |
| >40                    | 22              | 13 (28.3%)    | 9 (19.6%)    |                |
| ≤40                    | 24              | 10 (21.7%)    | 14 (30.4%)   |                |
| AST(U/L)               |                 |               |              | 0.236          |
| >40                    | 25              | 15 (32.6%)    | 10 (21.7%)   |                |
| ≤40                    | 21              | 8 (17.4%)     | 13 (28.3%)   |                |
| Child-Pugh Class       |                 |               |              | <b>0.011</b>   |
| A                      | 31              | 20 (43.5%)    | 11 (23.9%)   |                |
| B                      | 15              | 3 (6.5%)      | 12 (26.1%)   |                |
| Vascular invasion      |                 |               |              | <b>0.008</b>   |
| No                     | 22              | 16 (34.8%)    | 6 (13.0%)    |                |
| Yes                    | 24              | 7 (15.2%)     | 17 (37.0%)   |                |
| Microvascular invasion |                 |               |              | 0.491          |
| No                     | 35              | 19 (41.3%)    | 16 (34.8%)   |                |
| Yes                    | 11              | 4 (8.7%)      | 7 (15.2%)    |                |
| TNM stage              |                 |               |              | <b>0.016</b>   |
| I-II                   | 27              | 18 (39.1%)    | 9 (19.6%)    |                |
| III-IV                 | 19              | 5 (10.9%)     | 14 (30.4%)   |                |
| Tumor size(cm)         |                 |               |              | 0.373          |
| ≤5                     | 20              | 8 (17.4%)     | 12 (26.1%)   |                |
| >5                     | 26              | 15 (32.6%)    | 11 (23.9%)   |                |
| Tumor number           |                 |               |              | 0.187          |
| Multiple               | 6               | 5 (10.9%)     | 1 (2.2%)     |                |
| Single                 | 40              | 18 (39.1%)    | 22 (47.8%)   |                |
| Tumor encapsulation    |                 |               |              | 0.231          |
| No                     | 27              | 16 (34.8%)    | 11 (23.9%)   |                |
| Yes                    | 19              | 7 (15.2%)     | 12 (26.1%)   |                |
| Tumor differentiation  |                 |               |              | 0.136          |
| Poor                   | 20              | 7 (15.2%)     | 13 (28.3%)   |                |
| Well                   | 26              | 16 (34.8%)    | 10 (21.7%)   |                |
| HBsAg                  |                 |               |              | 1.000          |
| Negative               | 13              | 7 (15.2%)     | 6 (13%)      |                |
| Positive               | 33              | 16 (34.8%)    | 17 (37%)     |                |
| Edmonson grade         |                 |               |              | 0.798          |
| II                     | 31              | 15 (32.6%)    | 16 (34.8%)   |                |
| III                    | 12              | 7 (15.2%)     | 5 (10.9%)    |                |
| IV                     | 3               | 1 (2.2%)      | 2 (4.3%)     |                |
